# Supplementary figures and images for: Evolution of alternative biosynthetic pathways for vitamin C following plastid acquisition in photosynthetic eukaryotes
Source: eLife journal article supplement (doi:10.7554/elife.06369), 2015-03-13

### Figure 3: Figure supplement 1

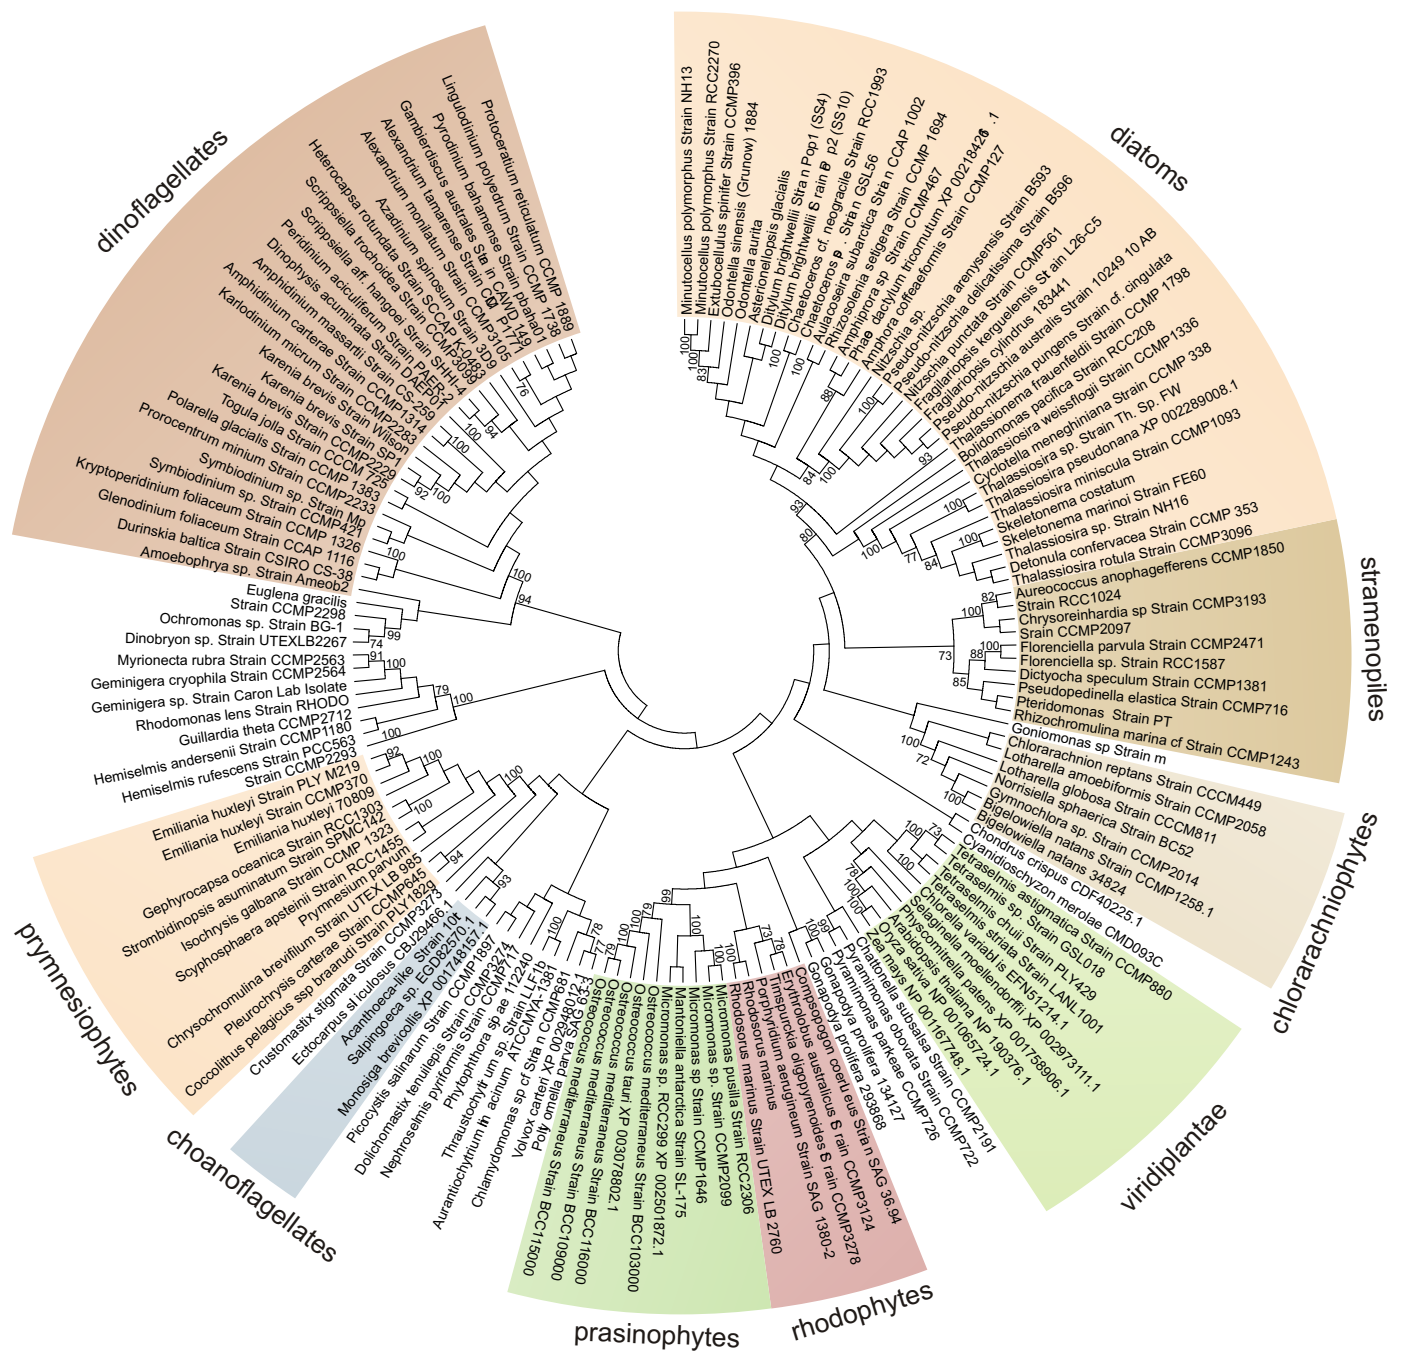

Supplement: supp [file elife-06369-supp-v1.zip]

Figure 4: Figure supplement 1

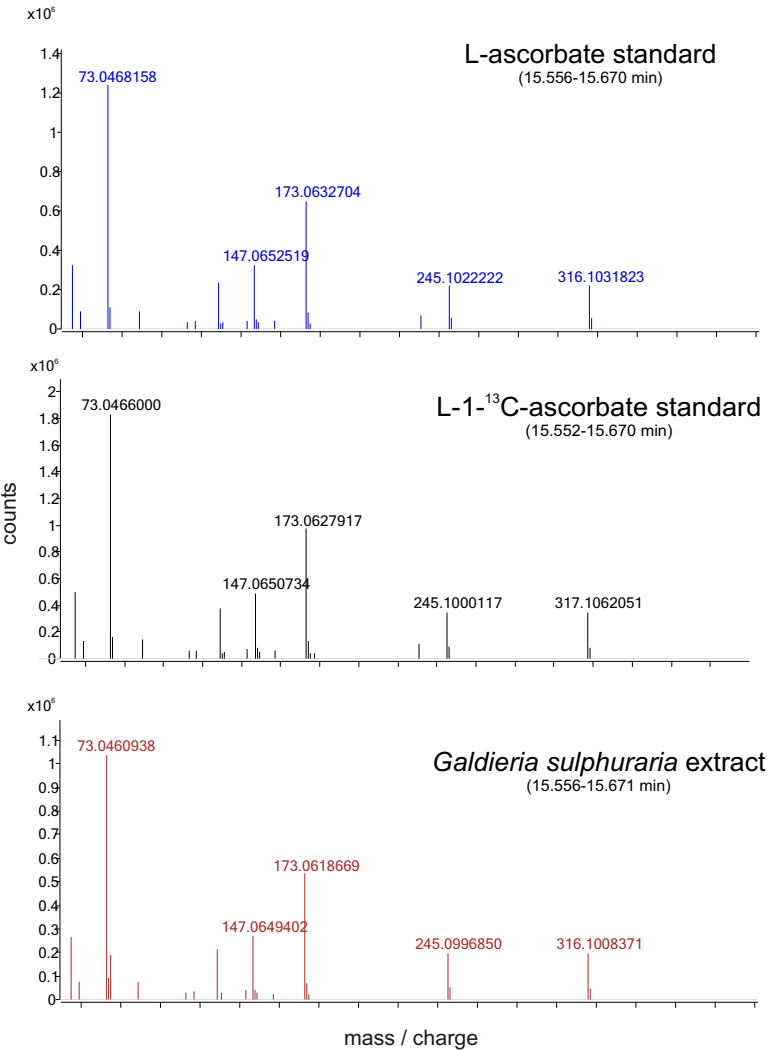

Supplement: supp [file elife-06369-supp-v1.zip]

Figure 2: Figure supplement 2

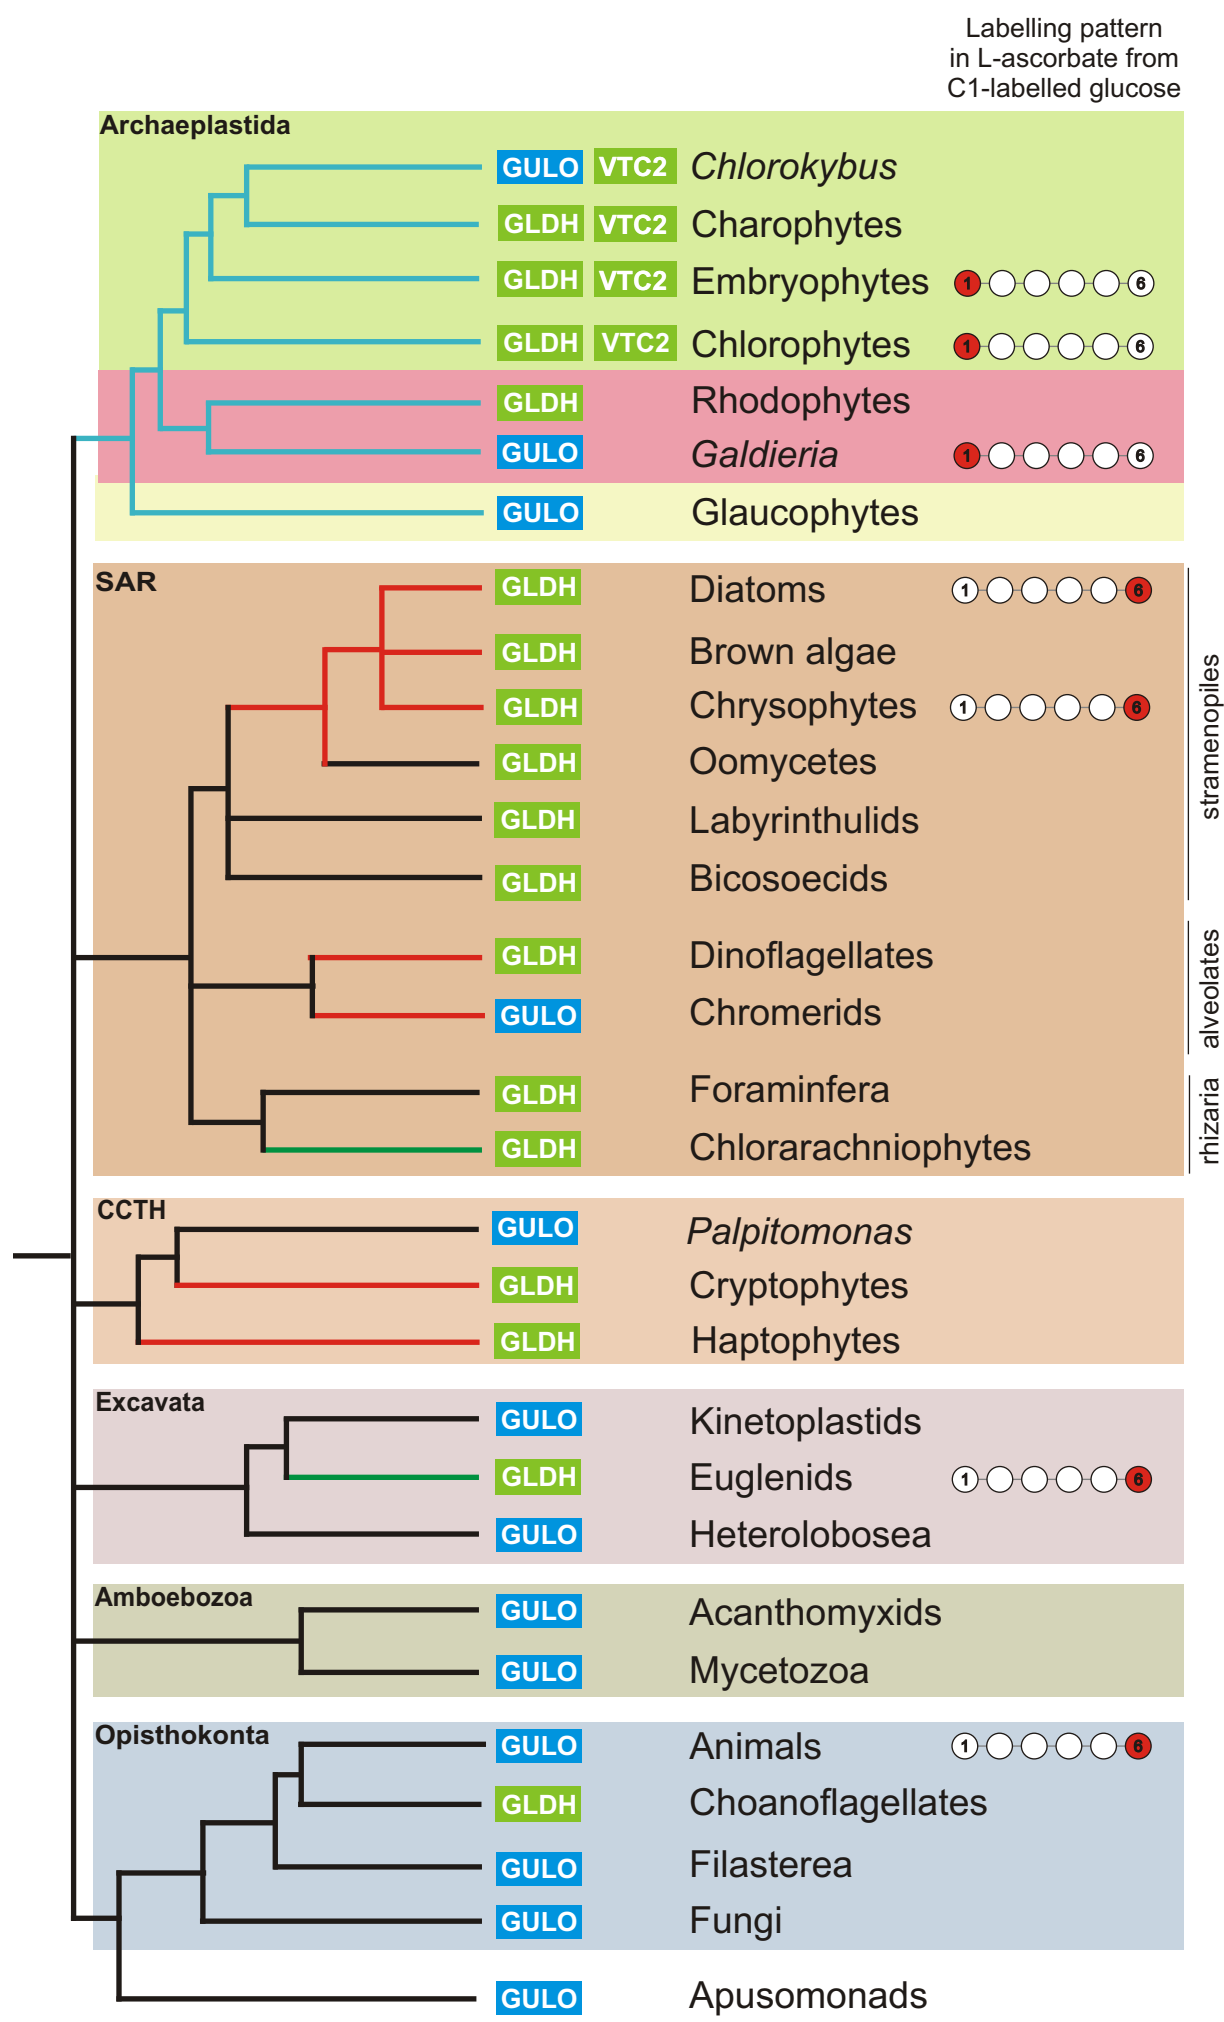

Supplement: supp [file elife-06369-supp-v1.zip]

Figure 2: Figure supplement 1

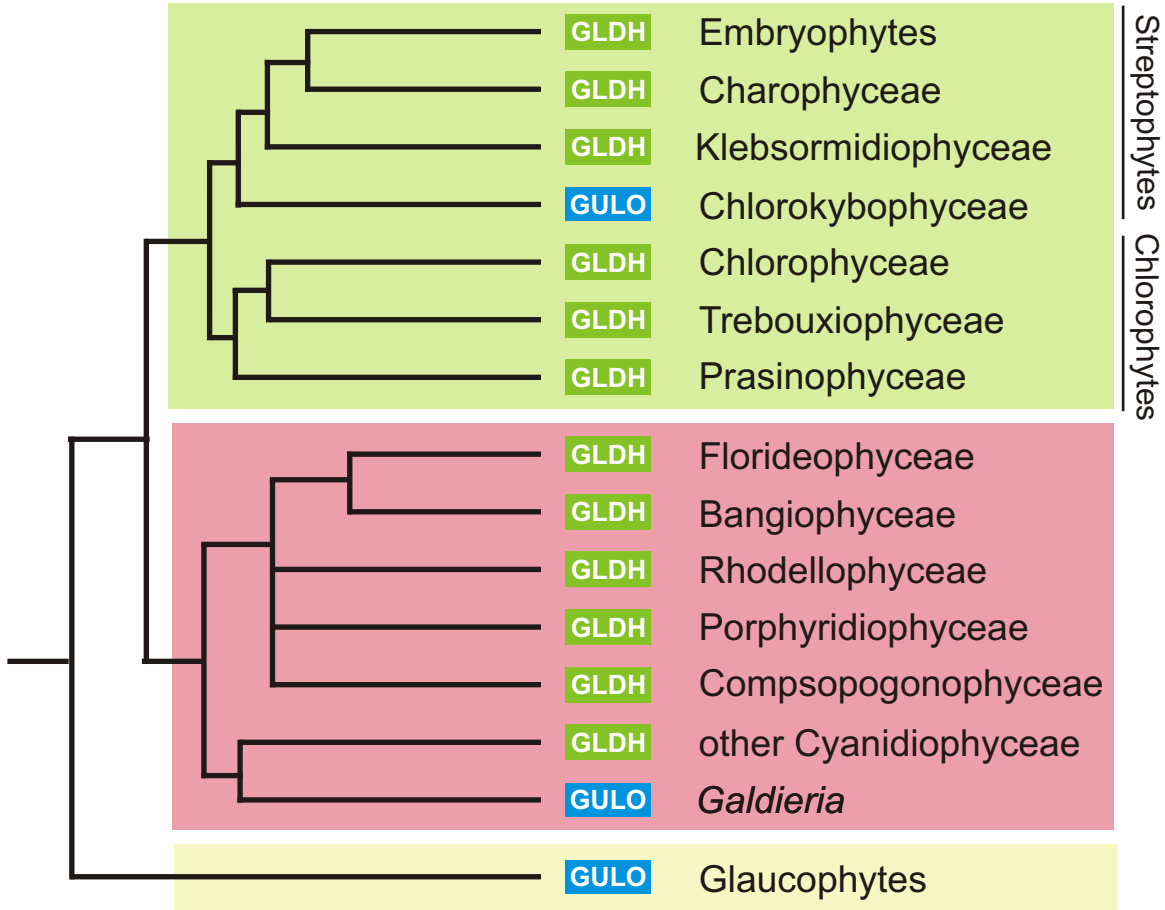

Supplement: supp [file elife-06369-supp-v1.zip]
